# Supplementary material for: Gradient porosity electrodes for fast charging lithium-ion batteries
Source: Royal Society of Chemistry journal article supplement (doi:10.1039/d2ta01707e), 2022-01-01
Supplement: d2ta01707e1.pdf [file d2ta01707e1.pdf]

**Table S1.** Summary of 1- and 3-layered graphite electrodes

| Graphite Electrodes | Mass Loading (mg/cm <sup>2</sup> ) | Measured Thickness from SEM (μm) | Calculated Porosity | Measured Porosity from Mercury Porosimetry |
|---------------------|------------------------------------|----------------------------------|---------------------|--------------------------------------------|
| <b>1-Layered</b>    | 9.0                                | 103                              | 25%                 | 27%                                        |
| <b>3-Layered</b>    |                                    |                                  |                     | 29% (overall)                              |
| Top Layer           | 2.8                                | 36                               | 35%                 |                                            |
| Middle Layer        | 3.2                                | 36                               | 25%                 |                                            |
| Bottom Layer        | 3.2                                | 32                               | 15%                 |                                            |

**Table S2:** Graphite anode parameters in numerical model.

| Parameter                             | Symbol           | Value                                                          |
|---------------------------------------|------------------|----------------------------------------------------------------|
| Porosity                              | $\epsilon_e$     | 15%-35%                                                        |
| Active solid fraction                 | $1 - \epsilon_e$ | 92%                                                            |
| Particle diameter                     | $a_r$            | 16.9 $\mu\text{m}$                                             |
| Active specific surface area          | $a$              | 2.83 $\text{m}^2/\text{g}$                                     |
| Tortuosity                            | $\tau$           | $\epsilon_e^{-0.5}$                                            |
| Equilibrium potential (V)             | $E_{eq}$         | Fig. S1                                                        |
| Electrical conductivity               | $\sigma$         | 100 S/m                                                        |
| Solid phase $\text{Li}^+$ diffusivity | $D_s$            | $1.45 \times 10^{-13} \text{m}^2/\text{s}$                     |
| Maximum concentration of Li in anode  | $c_s^{max}$      | 29047                                                          |
| Initial intercalation fraction        |                  | 0.01                                                           |
| Maximum intercalation fraction        |                  | 1                                                              |
| Anodic exchange current density       | $i_0$            | $i_0 = Fkc^{0.5} (c_s^{max} - c_s)^{0.5} c_s^{0.5}$            |
| Reaction rate constant                | $k$              | $\frac{m^{2.5}}{4.9 \times 10^{-11} \text{mol}^{0.5}\text{s}}$ |
| Anodic transfer coefficient           | $\alpha$         | 0.5                                                            |



**Table S3:** Electrolyte parameters in numerical model.

| <b>Parameter</b>                            | <b>Symbol</b>                       | <b>Value</b>                                           |
|---------------------------------------------|-------------------------------------|--------------------------------------------------------|
| <b>Initial salt concentration</b>           | $c_o$                               | 1200 mol/m <sup>3</sup>                                |
| <b>Ionic conductivity</b>                   | $\kappa$                            | See Figure S1                                          |
| <b>Li<sup>+</sup> diffusivity</b>           | $D$                                 |                                                        |
| <b>Effective ionic conductivity</b>         | $\kappa_{eff}$                      | $\kappa_{eff} = \kappa \times \frac{\epsilon_e}{\tau}$ |
| <b>Effective Li<sup>+</sup> diffusivity</b> | $D_{eff}$                           | $D_{eff} = D \times \frac{\epsilon_e}{\tau}$           |
|                                             | $\partial f_{\pm} / \partial \ln c$ | See Figure S1                                          |
| <b>Transference number</b>                  | $t_+$                               | See Figure S1                                          |

**Table S4:** Lithium metal electrode parameters in numerical model.

| <b>Parameter</b>                           | <b>Value</b>            |
|--------------------------------------------|-------------------------|
| <b>Exchange current density</b>            | 20 A/m <sup>2</sup>     |
| <b>Anodic transfer coefficient</b>         | 0.5                     |
| <b>Cathodic transfer coefficient</b>       | 0.5                     |
| <b>Equilibrium potential</b>               | 0                       |
| <b>Electrolyte reference concentration</b> | 1200 mol/m <sup>3</sup> |

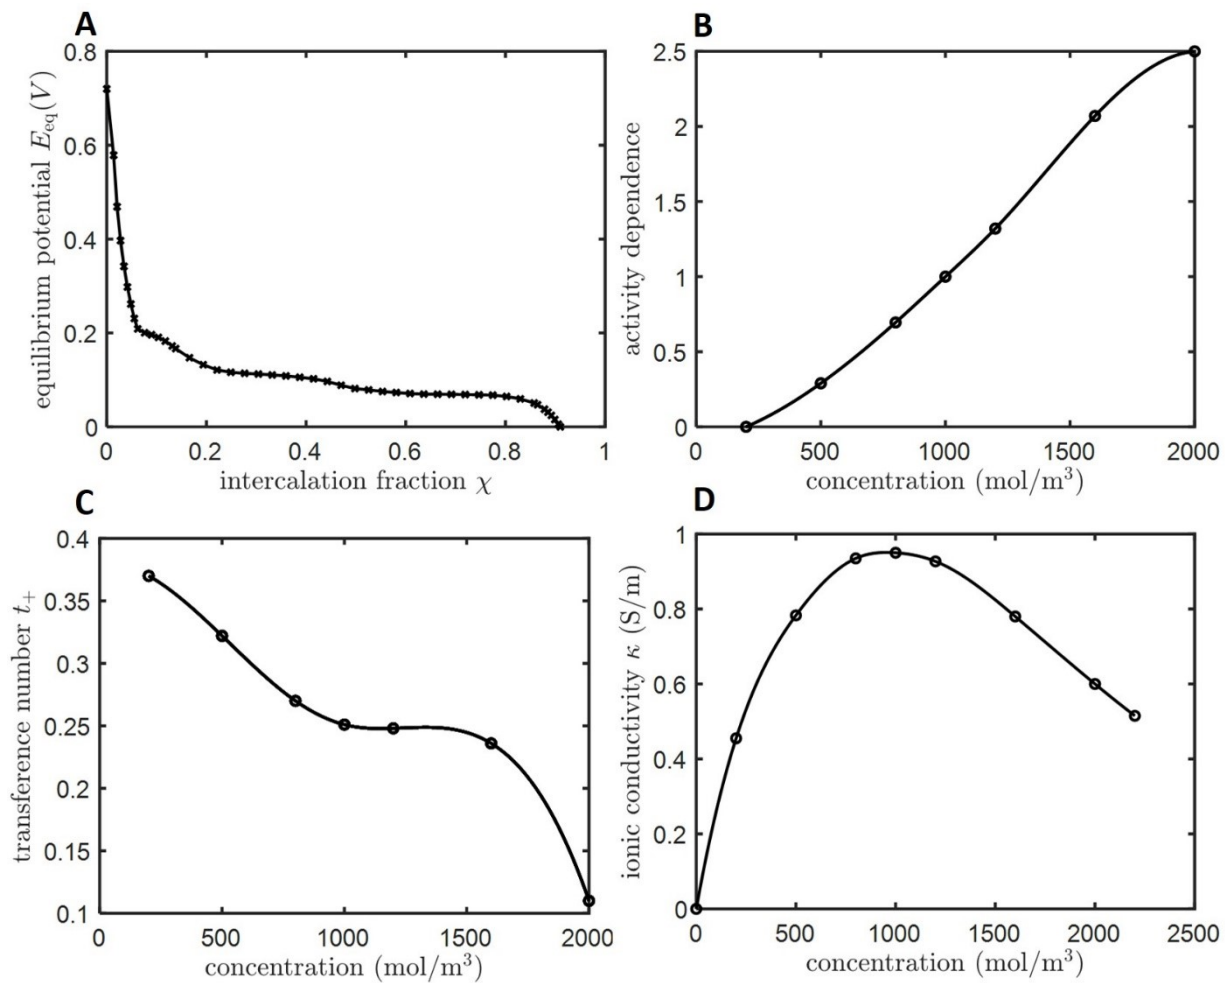

**Figure S1:** Material properties used in simulations of mono- and tri-layered graphite anode half-cells. A. Graphite equilibrium potential function. B. Ionic conductivity  $\kappa$  C. transference number  $t_+$  and D. activity coefficient as a function of Li<sup>+</sup> concentration  $C$ .
